# Supplementary material for: Model of metabolism and gene expression predicts proteome allocation in Pseudomonas putida
Source: Springer Nature journal article supplement (doi:10.1038/s41540-025-00521-1), 2025-05-24
Supplement: MOESM1 [file 41540_2025_521_MOESM1_ESM.pdf]

# Supplementary Information for

## **Model of metabolism and gene expression predicts proteome allocation in *Pseudomonas putida***

Juan D. Tibocha-Bonilla *et al.*

\*Corresponding author. Email: (Karsten Zengler) [kzengler@ucsd.edu](mailto:kzengler@ucsd.edu)

**This PDF file includes:**

**Supplementary Figures 1 to 2**

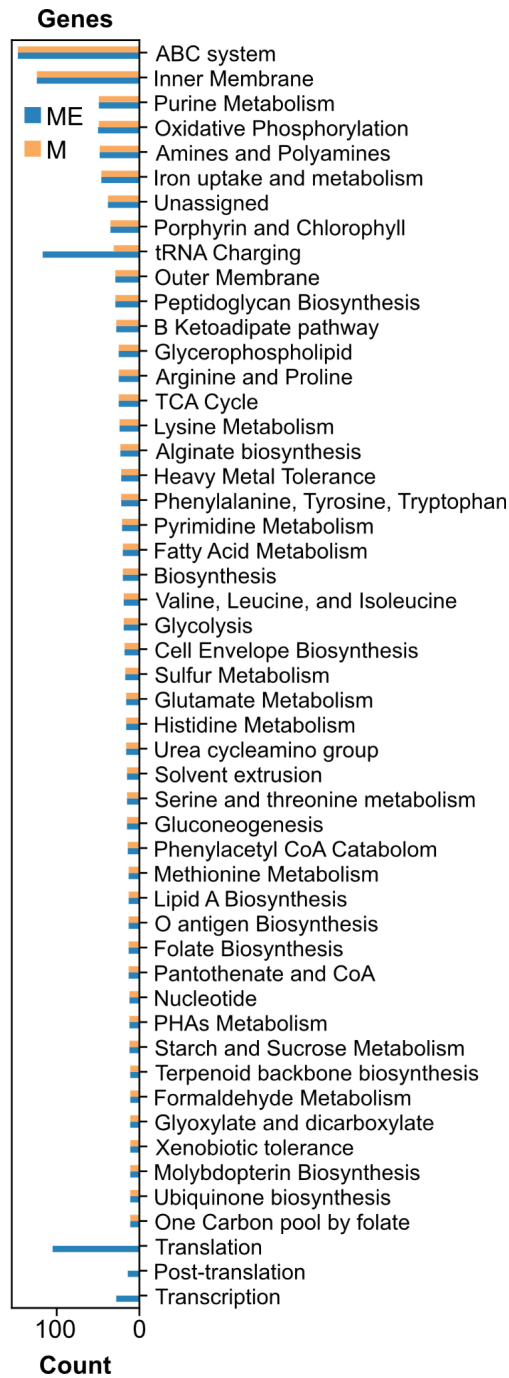

**Supplementary Figure 1. Breakdown of genes in their respective annotated pathways in *iPpu1676*-ME and the template M-model, *iJN1462*.**

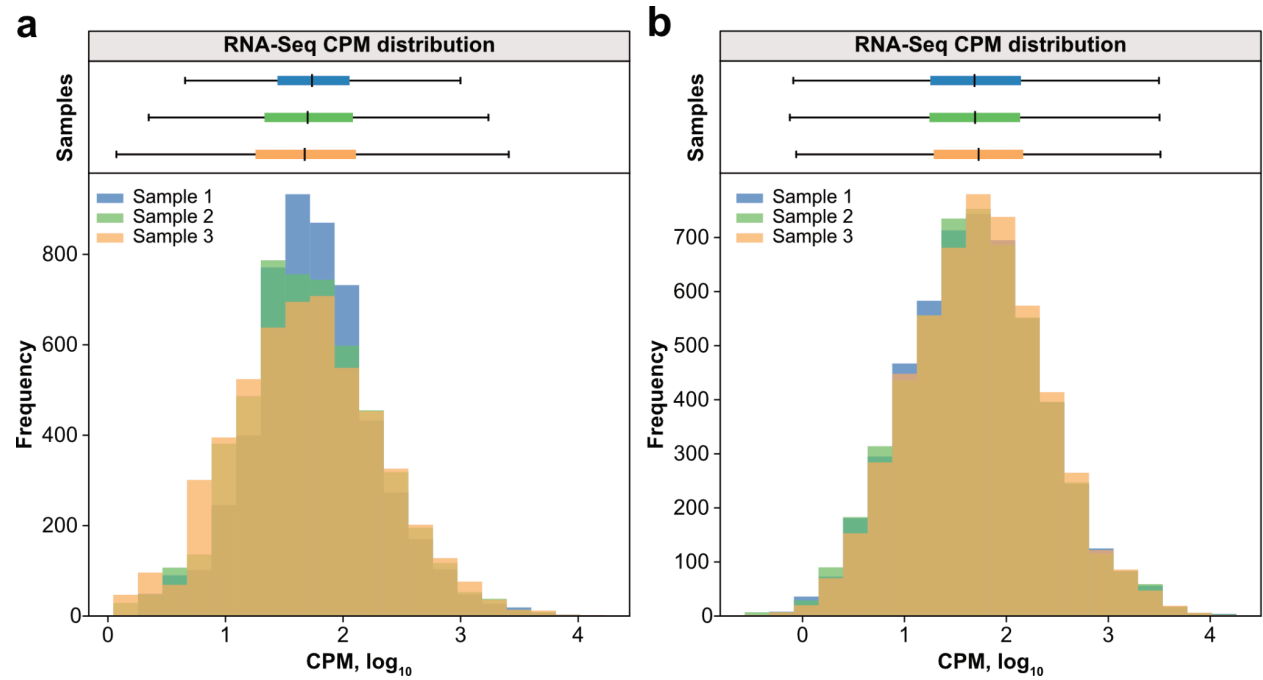

**Supplementary Figure 2. Multi-omic data (CPM) of *P. putida* KT2440 growth in glucose. a,** Distribution of RNA-Seq raw read counts in the three biological replicate samples. **b,** Distribution of Ribo-Seq raw read counts in the three samples.
